# Supplementary material
Source: MDPI journal article supplement (https://www.mdpi.com/1424-8247/16/2/285)
Supplement: s1 [file s1]

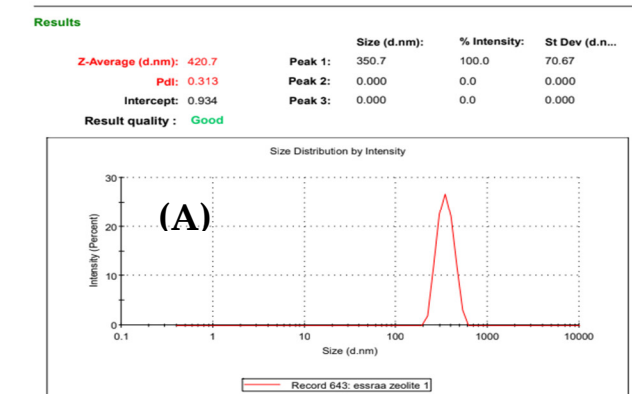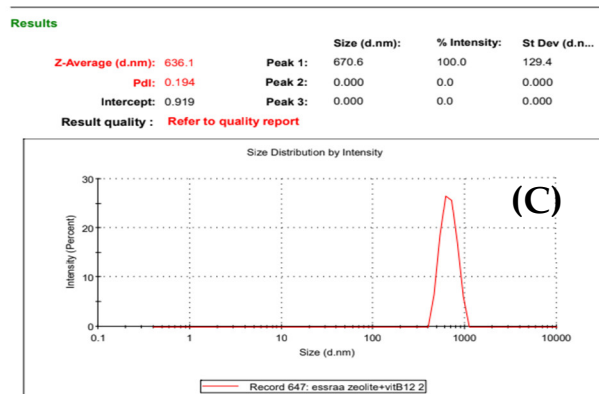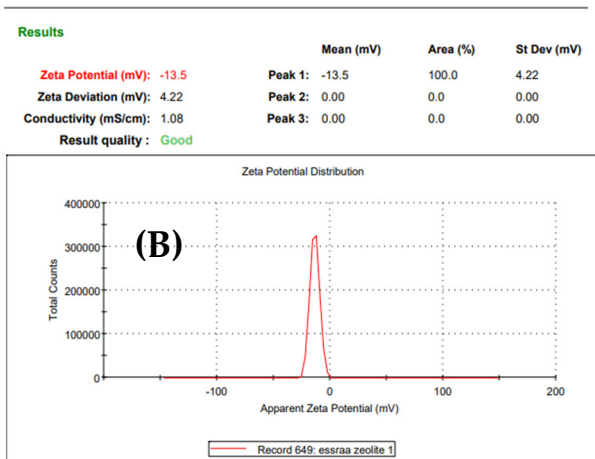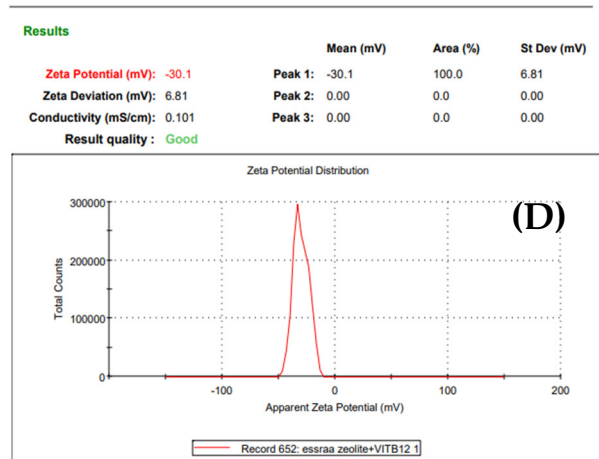

**Figure S1.** presented the hydrodynamic particle size and the zeta potential of the prepared Nano ZT (a&b) and Nano ZT/VB12 (c&d) respectively.

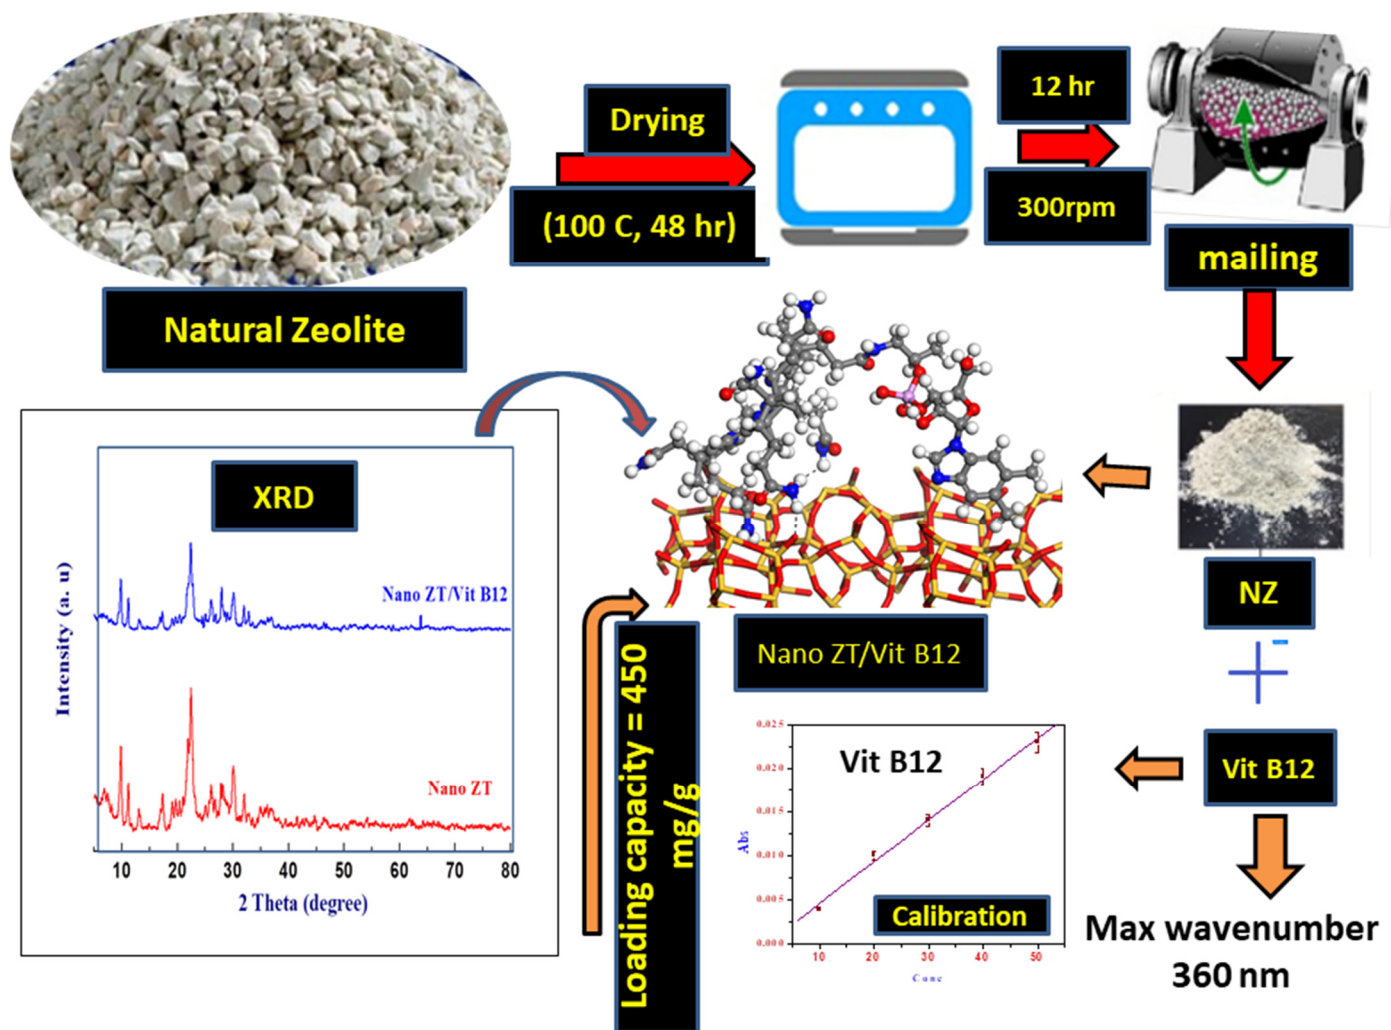

**Figure S2.** Preparation of Nano ZT/Vit B 12.

**Table S1.** Applied conditions of the ball milling process for the preparation of Nano ZT.

| Process Condition               | Description               |
|---------------------------------|---------------------------|
| Balls diameters                 | Ranged from 1.6 to 1.9 cm |
| Vessel diameter                 | 7.8 cm                    |
| Materials of vessel             | Stain steel               |
| Materials of used balls         | Porcelain                 |
| Ball/Natural-zeolite mass ratio | 15:1                      |
| Speed                           | 300 rpm                   |
| Time                            | 12 h                      |

**Table S2.** BJH pore size distribution adsorption of the prepared Nano ZT/Vit B12.

| Table - BJH Pore Size Distribution Adsorption |                  |                                   |               |                            |                |                             |
|-----------------------------------------------|------------------|-----------------------------------|---------------|----------------------------|----------------|-----------------------------|
| radius nm                                     | Pore Volume cc/g | Pore Surf. Area m <sup>2</sup> /g | dV(r) cc/nm/g | dS(r) m <sup>2</sup> /nm/g | dV(log r) cc/g | dS(log r) m <sup>2</sup> /g |
| 1.92090                                       | 8.025859e-03     | 8.356359e+00                      | 1.613582e-02  | 1.680029e+01               | 7.096870e-02   | 7.389115e+01                |
| 2.56579                                       | 1.837888e-02     | 1.642640e+01                      | 1.306551e-02  | 1.018439e+01               | 7.657298e-02   | 5.968760e+01                |
| 3.70896                                       | 3.241140e-02     | 2.399323e+01                      | 9.392978e-03  | 5.065024e+00               | 7.912127e-02   | 4.266497e+01                |
| 6.51695                                       | 5.681940e-02     | 3.148384e+01                      | 5.921321e-03  | 1.817206e+00               | 8.580859e-02   | 2.633397e+01                |
| 60.4979                                       | 1.400603e-01     | 3.423570e+01                      | 8.016277e-04  | 2.650100e-02               | 7.449183e-02   | 2.462624e+00                |
